# Supplementary material for: Dissecting organ-specific transcriptomes through RNA-sequencing
Source: PubMed Central journal article supplement (PMC3819660; doi:10.1186/1746-4811-9-42), 2013-10-25
Supplement: 1746-4811-9-42-S1.pdf [file 1746-4811-9-42-S1.pdf]

## Additional file 1

### Perl scripts and command lines for transcript normalization

I. Applying bowtie (<http://bowtie-bio.sourceforge.net/index.shtml>): `bowtie -a -p 10 -v 3 trinity -f A.PER --suppress 5,6,7 A_PER_bowtie_trinity.av3`, to the final assembly file. PER is for paired-end reads. The outcome file is called `bowtieResult` and used in the next command line:

```
ReadMap.pl AssembledCtg bowtieResult RdLen MinD MaxD MinCatenatedPEC ReadMap
```

Here, `AssembledCtg` is the final assembly in fasta format, `RdLen` is the length of read, `MinD` and `MaxD` are the minimum and maximum lengths of fragments in the sequencing library, respectively. `MinCatenatedPEC` is the predefined number for minimum PERs that are consecutively mapped to the same scaffold (we used 5), and `ReadMap` records the positions and number of reads on each scaffold.

II. Normalization of reads by TMM (Robinson and Oshlack, 2010) method is carried out by:

```
gsExprn.pl ReadMapList AssembledCtg MTrim ATrim Exprn
```

Here, `ReadMapList` is a list of `ReadMap` from each sample handled above, `AssembledCtg` refers to the assembly of each sample (fasta format), `MTrim` and `ATrim` are the pre-defined cutting standards of the house keeping gene set (we used 0.3 and 0.2, respectively), and `Exprn` lists for each scaffold the number of normalized abundance level.

III. The abundance level file is then combined with information of KEGG:

```
Map2Exprn.pl MapTitle Map2EC EC2Name Gene2ECONe Expression Result
```

Here, `MapTitle` refers to the name of pathway or network map, downloadable from KEGG (`map_title.tab`). `Map2EC`, `EC2Name`, `Gene2ECONe`, and `Expression` (from [gsExprn.pl](#)) are the output files from the corresponding Perl scripts. The final output is `Result`, which lists the R factors for the samples and three sets of measures for abundance levels including raw, normalized and RPKM for each scaffold.

### Perl scripts

```
*****ReadMap.pl*****
```

```
#!/usr/bin/perl -w  
use strict;
```

```
@ARGV or die "$0 AssembledCtg bowtieResult RdLen MinD MaxD MinCatenatedPEC  
ReadMap\n";
```

```

my ($RdLen,$MinD,$MaxD,$MinPECN)=$(ARGV[2],$ARGV[3],$ARGV[4],$ARGV[5]);
my (%AsL,$CtgID,%Rd2Seq,$RdID,%RdHit);

open(IN,"<$ARGV[0]") or die "Can't open $ARGV[0]!\n";
while(<IN>){
    chomp;
    if($_ =~ /^(\S+)\s+Len=(\d+)/){$AsL{$1}=$2;}
}
close(IN);

open(IN,"<$ARGV[1]") or die "Can't open $ARGV[1]!\n";
while(<IN>){if($_ =~ /^(\S+)\_(\d)\s+(\S+)\s+(\S+)\s+(\d+)/){$RdHit{$4}{$1}{$2}{$5}=$3;}}
close(IN);

open(OUT,">$ARGV[6]") or die "Can't open $ARGV[6]!\n";
for $CtgID (keys %RdHit){
    my ($S,$E,%PERHit,$Pos1,$Pos2,$i,$j);
    for $RdID (keys %{$RdHit{$CtgID}}){
        if(defined $RdHit{$CtgID}{$RdID}{1}&&defined $RdHit{$CtgID}{$RdID}{2}){
            for $Pos1 (keys %{$RdHit{$CtgID}{$RdID}{1}}){
                for $Pos2 (keys %{$RdHit{$CtgID}{$RdID}{2}}){
                    $S=$E=0;
                    if($RdHit{$CtgID}{$RdID}{1}{$Pos1} eq
"+"&&$RdHit{$CtgID}{$RdID}{2}{$Pos2} eq "-"&&$Pos1<$Pos2){
                        $S=$Pos1; $E=$Pos2+$RdLen;
                    }elseif($RdHit{$CtgID}{$RdID}{1}{$Pos1} eq
"-"&&$RdHit{$CtgID}{$RdID}{2}{$Pos2} eq "+"&&$Pos2<$Pos1){
                        $S=$Pos2; $E=$Pos1+$RdLen;
                    }
                    if($E-$S>=$ARGV[3]&&$E-$S<=$ARGV[4]){$PERHit{$S}."($RdID $E)";}
                }
            }
        }
    }
}

if(%PERHit){
    $i=0; $S="";
    my ($HitN,%Ac,$Flag);
    while($i<$AsL{$CtgID}){
        if(defined $PERHit{$i}){
            if($S eq ""){$S=$E=$i;}
            while($PERHit{$i} =~ /\(\S+\s+(\d+)\)/g){
                $HitN++;
                if($1>$E){$E=$1;}
            }
        }
        $i++;
    }
}

```

```

    }
    $Flag=0; $j=$i+1;
    while($j<=$i+$RdLen){
        if(defined $PERHit{$j}){$Flag++; last;}
        else{$j++;}
    }
    if($Flag==0){
        if($HitN>=$ARGV[5]){$Ac{$S}=$E;}
        $S="";
    }
    $i=$j;
}else{$i++;}
}

for($i=0;$i<$AsL{$Ctgd};$i++){
    if(defined $Ac{$i}){
        print OUT ">$Ctgd\n";
        $HitN=0;
        for($j=$i;$j<$Ac{$i};$j++){
            if(defined $PERHit{$j}){
                while($PERHit{$j} =~ /\((\S+)\s+(\d+)\)/g){
                    $HitN++;
                    print OUT "\t$j\t$2\t$1\n";
                }
            }
        }
        print OUT "\tPERHitN=$HitN\n";
    }
}
}
}
}
close(OUT);

```

\*\*\*\*\*gsExprn.pl\*\*\*\*\*

```
#!/usr/bin/perl -w
```

```
use strict;
```

```
my (%PERN,%PERNInGene,%GeneL,$Gene,$Sample,%R);
```

```
sub Read{
```

```
    open(IN,"<$ARGV[0]") or die "Can't open $ARGV[0]!\n";
```

```
    my (%List,$File);
```

```
    while(<IN>){chomp; $List{$_}++;}
```

```
    close(IN);
```

```

for $File (keys %List){
    $File=~/^(\w+?)\.;/; $Sample=$1;
    print "$File\n";
    open(IN,"<$File") or die "Can't open $File!\n";
    my (%Repeat,%Gene2PER,$PER);
    while(<IN>){
        if($_=~/^>(\S+?)_d+_d+$/){$Gene=$1;}
        elsif($_=~/^>s+d\s+d\s+(\S+)/){$Repeat{$1}++; $Gene2PER{$Gene}{$1}++;}
    }
    close(IN);

    for $Gene (keys %Gene2PER){
        for $PER (keys %{$Gene2PER{$Gene}}){
            $PERInGene{$Gene}{$Sample}+=$Gene2PER{$Gene}{$PER}/$Repeat{$PER};
        }
        $PERN{$Sample}+=$PERInGene{$Gene}{$Sample};
    }
}

open(IN,"<$ARGV[1]") or die "Can't open $ARGV[1]!\n";
while(<IN>){if($_=~/^>(\S+)\s+Len=(\d+)/){$GeneL{$1}=$2;}}
close(IN);
}

sub TMM{
    print "TMM...\n";
    my
(%N,%Y,%Mean,$MeanN,%Mvalue,%Avalue,$Flag,%MaxM,%MinM,%MaxA,%MinA,$m,$y,$a,%w)
;
    for $Gene (keys %PERNInGene){
        $Flag=1;
        for $Sample (keys %{$PERNInGene{$Gene}}){$Flag*=$PERNInGene{$Gene}{$Sample};}
        if($Flag!=0){
            for $Sample (keys %{$PERNInGene{$Gene}}){
                $Y{$Gene}{$Sample}=$PERNInGene{$Gene}{$Sample}/$GeneL{$Gene};
                $N{$Sample}+=$PERNInGene{$Gene}{$Sample};
            }
        }
    }
}

for $Gene (keys %Y){
    for $Sample (keys %{$Y{$Gene}}){$Mean{$Gene}+=$Y{$Gene}{$Sample};}
    $Mean{$Gene}/=keys %{$Y{$Gene}};
}

```

```

}
for $Sample (keys %N){$MeanN+=$N{$Sample};}
$MeanN/=keys %N;

for $Sample (keys %N){
    $MaxM{$Sample}=$MinM{$Sample}=0;
    $MaxA{$Sample}=-100; $MinA{$Sample}=100;
}
for $Gene (keys %Mean){
    $m=$Mean{$Gene}/$MeanN;
    for $Sample (keys %{$Y{$Gene}}){
        $y=$Y{$Gene}{$Sample}/$N{$Sample};
        $Mvalue{$Sample}{$Gene}=log($y/$m);
        $Avalue{$Sample}{$Gene}=0.5*log($y*$m);

        if($Mvalue{$Sample}{$Gene}>$MaxM{$Sample}){$MaxM{$Sample}=$Mvalue{$Sample}{$Gene};}

        if($Avalue{$Sample}{$Gene}>$MaxA{$Sample}){$MaxA{$Sample}=$Avalue{$Sample}{$Gene};}

        if($Mvalue{$Sample}{$Gene}<$MinM{$Sample}){$MinM{$Sample}=$Mvalue{$Sample}{$Gene};}

        if($Avalue{$Sample}{$Gene}<$MinA{$Sample}){$MinA{$Sample}=$Avalue{$Sample}{$Gene};}
    }
}

for $Sample (keys %Mvalue){
    for $Gene (keys %{$Mvalue{$Sample}}){

        $m=($Mvalue{$Sample}{$Gene}-$MinM{$Sample})/($MaxM{$Sample}-$MinM{$Sample});

        $a=($Avalue{$Sample}{$Gene}-$MinA{$Sample})/($MaxA{$Sample}-$MinA{$Sample});
        if(($m>1-$ARGV[2] || $m<$ARGV[2])&&($a>1-$ARGV[3] || $a<$ARGV[3])){
            delete $Mvalue{$Sample}{$Gene};
            delete $Avalue{$Sample}{$Gene};
        }
    }
}

for $Sample (keys %Mvalue){
    my $HouseN=0;

```

```

    for $Gene (keys %{$Mvalue{$Sample}}){
        $w{$Sample}{$Gene}=1/$Y{$Gene}{$Sample}+1/$Mean{$Gene};
        $HouseN++;
    }
    print "$Sample:\t$HouseN\n";
}
for $Sample (keys %Mvalue){
    my ($Denominator,$Numerator);
    for $Gene (keys %{$Mvalue{$Sample}}){

        $Numerator+=$w{$Sample}{$Gene}*log(($Y{$Gene}{$Sample}/$N{$Sample})/($Mean{$Gene}/$MeanN));
        $Denominator+=$w{$Sample}{$Gene};
    }
    $R{$Sample}=exp($Numerator/$Denominator);
}
}

sub Print{
    print "Print...\n";
    open(OUT,">$ARGV[4]") or die "Can't open $ARGV[4]\n";
    for $Sample (sort keys %PERN){printf OUT
"$Sample:\t%15.2f\tR:%10.2f\n",$PERN{$Sample},$R{$Sample};}
    printf OUT "%20s", " ";
    for $Sample (sort keys %PERN){printf OUT "%-8s",$Sample;}
    printf OUT "\n";

    my ($RPKM,$Tmp);
    for $Gene (sort keys %PERNinGene){
        printf OUT "%-15s%-5s",$Gene,"Raw:";
        for $Sample (sort keys %PERN){
            if(defined $PERNinGene{$Gene}{$Sample}){printf OUT
"%-8d",$PERNinGene{$Gene}{$Sample};}
            else{printf OUT "%-8d",0;}
        }

        printf OUT "%-8s","Normal:";
        for $Sample (sort keys %PERN){
            if(defined $PERNinGene{$Gene}{$Sample}){
                $Tmp=$PERNinGene{$Gene}{$Sample}/$R{$Sample};
                printf OUT "%-8d",$Tmp;
            }else{printf OUT "%-8d",0;}
        }
    }
}

```

```

    printf OUT "%-6s", "RPKM:";
    for $Sample (sort keys %PERN){
        my $Denominator=$PERN{$Sample}*$GeneL{$Gene};
        if(defined $PERNInGene{$Gene}{$Sample}){
            $RPKM=1e9*$PERNInGene{$Gene}{$Sample}/$Denominator;
            printf OUT "%-8d", $RPKM;
        }else{printf OUT "%-8d", 0;}
    }
    printf OUT "\n";
}
close(OUT);
}

#main
@ARGV or die "Usage:$0 ReadMapList AssembledCtg MTrim ATrim Exprn\n";
Read();
TMM();
Print();

*****Map2Exprn.pl*****

#!/usr/bin/perl -w
use strict;
my (%MapTitle,%Map2EC,%EC2Name,%GeneOfEC,%Exprn,$Map,$EC,$Unigene,$ECGene);

sub Read{
    open(IN,"<$ARGV[0]") or die "Can't open $ARGV[0]\n";
    while(<IN>){chomp; $_=~/^(\S+)\s+(\w.+)/; $MapTitle{$1}=$2;}
    close(IN);

    open(IN,"<$ARGV[1]") or die "Can't open $ARGV[1]\n";
    while(<IN>){
        chomp;
        if($_=~/^>(\S+)/){$Map=$1;}
        elsif($_=~/^>\s+(\S+)/){$Map2EC{$Map}{$1}++;}
    }
    close(IN);

    open(IN,"<$ARGV[2]") or die "Can't open $ARGV[2]\n";
    while(<IN>){chomp; $_=~/^(\S+)\s+(\w.+)/; $EC2Name{$1}=$2;}
    close(IN);

    open(IN,"<$ARGV[3]") or die "Can't open $ARGV[3]\n";
    while(<IN>){
        $_=~s/\(.\+)//g;

```

```

    $_=~/^(\S+)\s+(\S+)\s+(\S+)\s+(\S+)/;
    $Unigene=$1; $ECGene=$2; $EC=$3;
    if(!defined
$GeneOfEC{$EC}{$Unigene}{$ECGene} || $GeneOfEC{$EC}{$Unigene}{$ECGene}>$4){
        $GeneOfEC{$EC}{$Unigene}{$ECGene}=$4;
    }
}
close(IN);

open(IN,"<$ARGV[4]") or die "Can't open $ARGV[4]\n";
while(<IN>){chomp; if($_=~/^(\S+?_?d+)\s+(\S.+?\S)\s+BlastAnno/){$Exprn{$1}=$2;}}
close(IN);
}

sub Write{
    open(OUT,">$ARGV[5]") or die "Can't open $ARGV[5]\n";
    for $Map (sort keys %Map2EC){
        printf OUT ">$Map\t$MapTitle{$Map}\n";
        for $EC (sort keys %{$Map2EC{$Map}}){
            if(defined $EC2Name{$EC}){printf OUT "\t$EC($EC2Name{$EC})\n";}
            else{printf OUT "\t$EC(No Name)\n";}
            if(defined $GeneOfEC{$EC}){
                my $MinE=10;
                for $Unigene (keys %{$GeneOfEC{$EC}}){
                    for $ECGene (keys %{$GeneOfEC{$EC}{$Unigene}}){
                        if($GeneOfEC{$EC}{$Unigene}{$ECGene}<$MinE&&defined
$Exprn{$Unigene}){
                            $MinE=$GeneOfEC{$EC}{$Unigene}{$ECGene};
                        }
                    }
                }
                for $Unigene (keys %{$GeneOfEC{$EC}}){
                    for $ECGene (keys %{$GeneOfEC{$EC}{$Unigene}}){
                        if($GeneOfEC{$EC}{$Unigene}{$ECGene}==$MinE&&defined
$Exprn{$Unigene}){
                            printf OUT
"\t\t%-20s%-30s%-12s\t$Exprn{$Unigene}\n",$Unigene,$ECGene,$GeneOfEC{$EC}{$Unigene}{$E
CGene};
                            last;
                        }
                    }
                }
            }else{printf OUT "\t\tNo Correspond Unigene\n";}
        }
    }
}

```



```
    }  
    close(OUT);  
}
```

```
# main program
```

```
@ARGV or die "Usage:Map2Exprn.pl MapTitle Map2EC EC2Name Unigene2EC Expression  
Result\n";  
Read();  
Write();
```
