# Supplementary material for: Dissecting organ-specific transcriptomes through RNA-sequencing
Source: PubMed Central journal article supplement (PMC3819660; doi:10.1186/1746-4811-9-42), 2013-10-25
Supplement: 1746-4811-9-42-S6.pdf [file 1746-4811-9-42-S6.pdf]

## Additional file 6

**A**

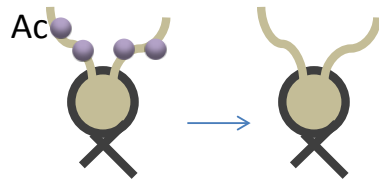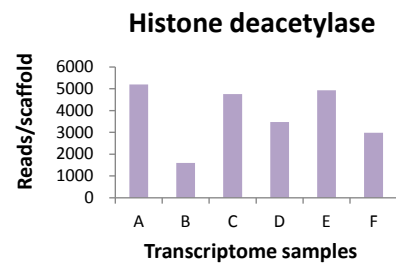

**B**

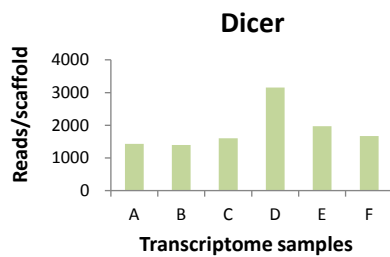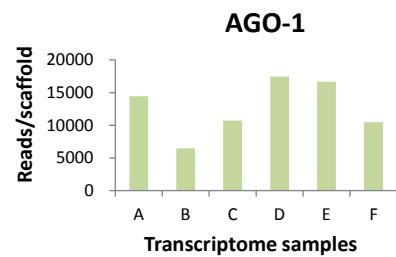

**C**

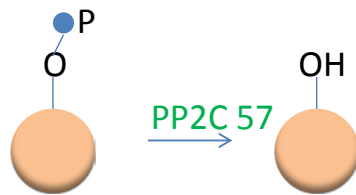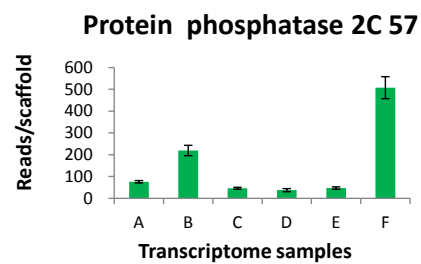

## Epigenetic events detected among samples A -> F

(A) Histone deacetylase was found in multiple copies, with the bars indicating the variations of their expression levels. (B) Contrasting expression patterns of homologs for dicer (ABCDEF\_40338) and argonaute 1 (AGO-1; ABCDEF\_38770). (C) Expression pattern of a protein phosphatase across samples, with variations of abundance levels from multiple copies shown by bars.
