# Supplementary material for: Dissecting organ-specific transcriptomes through RNA-sequencing
Source: PubMed Central journal article supplement (PMC3819660; doi:10.1186/1746-4811-9-42), 2013-10-25
Supplement: 1746-4811-9-42-S9.pdf [file 1746-4811-9-42-S9.pdf]

**Additional file 9** Additional primers used to verify some of the sequences obtained from RNA-sequencing.

| Gene name   | Genbank ID | Primer sequence<br>(forward primer, 5'→3') | Primer sequence<br>(reverse primer, 5'→3') |
|-------------|------------|--------------------------------------------|--------------------------------------------|
| <i>4CL</i>  | KC794953   | aaactcctgatattacatccc                      | acaacaaaagccaengnac                        |
| <i>PAL</i>  | KC794954   | atggaggcgccattgaaaac                       | ttaacagataggaaggagcacc                     |
| <i>CAH</i>  | KC794955   | tcgtagccataatagtcgc                        | actgaattgccctccttt                         |
| <i>3GGT</i> | KC794956   | gcagaaagctagctagcttg                       | gctaaaaccattctagctcagg                     |
